# Supplementary material for: Association of basal metabolic rate and fuel oxidation in basal conditions and during exercise, with plasma S-klotho: the FIT-AGEING study
Source: publisher site journal article supplement (doi:10.18632/aging.102100), 2019-08-07
Supplement: Supplementary file [file aging-v11i15-102100-supplementary-material-SD1.pdf]

## SUPPLEMENTARY MATERIAL

**Supplementary Table S1.** Association between energy metabolism outcomes with S-Klotho protein and age adjusted by visceral adipose tissue (Model 1), adjusted by VO<sub>2</sub>max (Model 2), adjusted by objectively measured moderate-vigorous physical activity (Model 3), and by total energy intake (Model 4).

|                                                       | Plasma S-klotho concentration |              |              |              |
|-------------------------------------------------------|-------------------------------|--------------|--------------|--------------|
|                                                       | Model 1                       | Model 2      | Model 3      | Model 4      |
| BMR (kcal/day)                                        | 0.126                         | 0.142        | 0.226        | 0.140        |
| BMR <sub>LM</sub> (kcal/ kg <sub>leanmass</sub> /day) | 0.634                         | 0.146        | 0.500        | 0.836        |
| BFox (g/min)                                          | <0.001                        | <0.001       | <0.001       | <0.001       |
| BFox (% BMR)                                          | <0.001                        | <0.001       | <0.001       | <0.001       |
| BCHox (g/min)                                         | <0.001                        | <0.001       | <0.001       | <0.001       |
| BCHox (% BMR)                                         | <0.001                        | <0.001       | <0.001       | <0.001       |
| MFO (g/min)                                           | <b>0.024</b>                  | <b>0.014</b> | <b>0.032</b> | <b>0.023</b> |
| MFO <sub>LM</sub> (g/kg <sub>leanmass</sub> /min)     | 0.232                         | 0.409        | 0.254        | 0.253        |
| Fat <sub>max</sub> (% VO <sub>2</sub> max)            | 0.109                         | 0.630        | 0.161        | 0.112        |
|                                                       | Chronological age             |              |              |              |
|                                                       | Model 1                       | Model 2      | Model 3      | Model 4      |
| BMR (kcal/day)                                        | 0.828                         | 0.287        | 0.758        | 0.983        |
| BMR <sub>LM</sub> (kcal/ kg <sub>leanmass</sub> /day) | 0.153                         | 0.206        | 0.128        | 0.139        |
| BFox (g/min)                                          | 0.459                         | 0.519        | 0.109        | 0.244        |
| BFox (% BMR)                                          | 0.834                         | 0.806        | 0.116        | 0.374        |
| BCHox (g/min)                                         | 0.692                         | 0.253        | 0.066        | 0.618        |
| BCHox (% BMR)                                         | 0.975                         | 0.629        | 0.110        | 0.407        |
| MFO (g/min)                                           | 0.874                         | 0.343        | 0.896        | 0.979        |
| MFO <sub>LM</sub> (g/kg <sub>leanmass</sub> /min)     | 0.155                         | 0.168        | 0.147        | 0.132        |
| Fat <sub>max</sub> (% VO <sub>2</sub> max)            | 0.275                         | 0.918        | 0.051        | 0.655        |

P value of multiple-regression analysis. Abbreviations: BMR: Basal Metabolic Rate; BMR<sub>LM</sub>: Basal Metabolic Rate relative to lean mass; BFox: Basal Fat Oxidation; BCHox: Basal Carbohydrate Oxidation; MFO: Maximal Fat Oxidation; MFO<sub>LM</sub>: Maximal Fat Oxidation relative to lean mass; Fat<sub>max</sub>: Intensity of exercise that elicits MFO; VO<sub>2</sub>max: Maximum Oxygen Uptake.
