# Supplementary material for: Association of basal metabolic rate and fuel oxidation in basal conditions and during exercise, with plasma S-klotho: the FIT-AGEING study
Source: publisher site journal article supplement (doi:10.18632/aging.102100), 2019-08-07
Supplement: Supplementary file [file aging-v11i15-102100-supplementary-material-SD2.pdf]

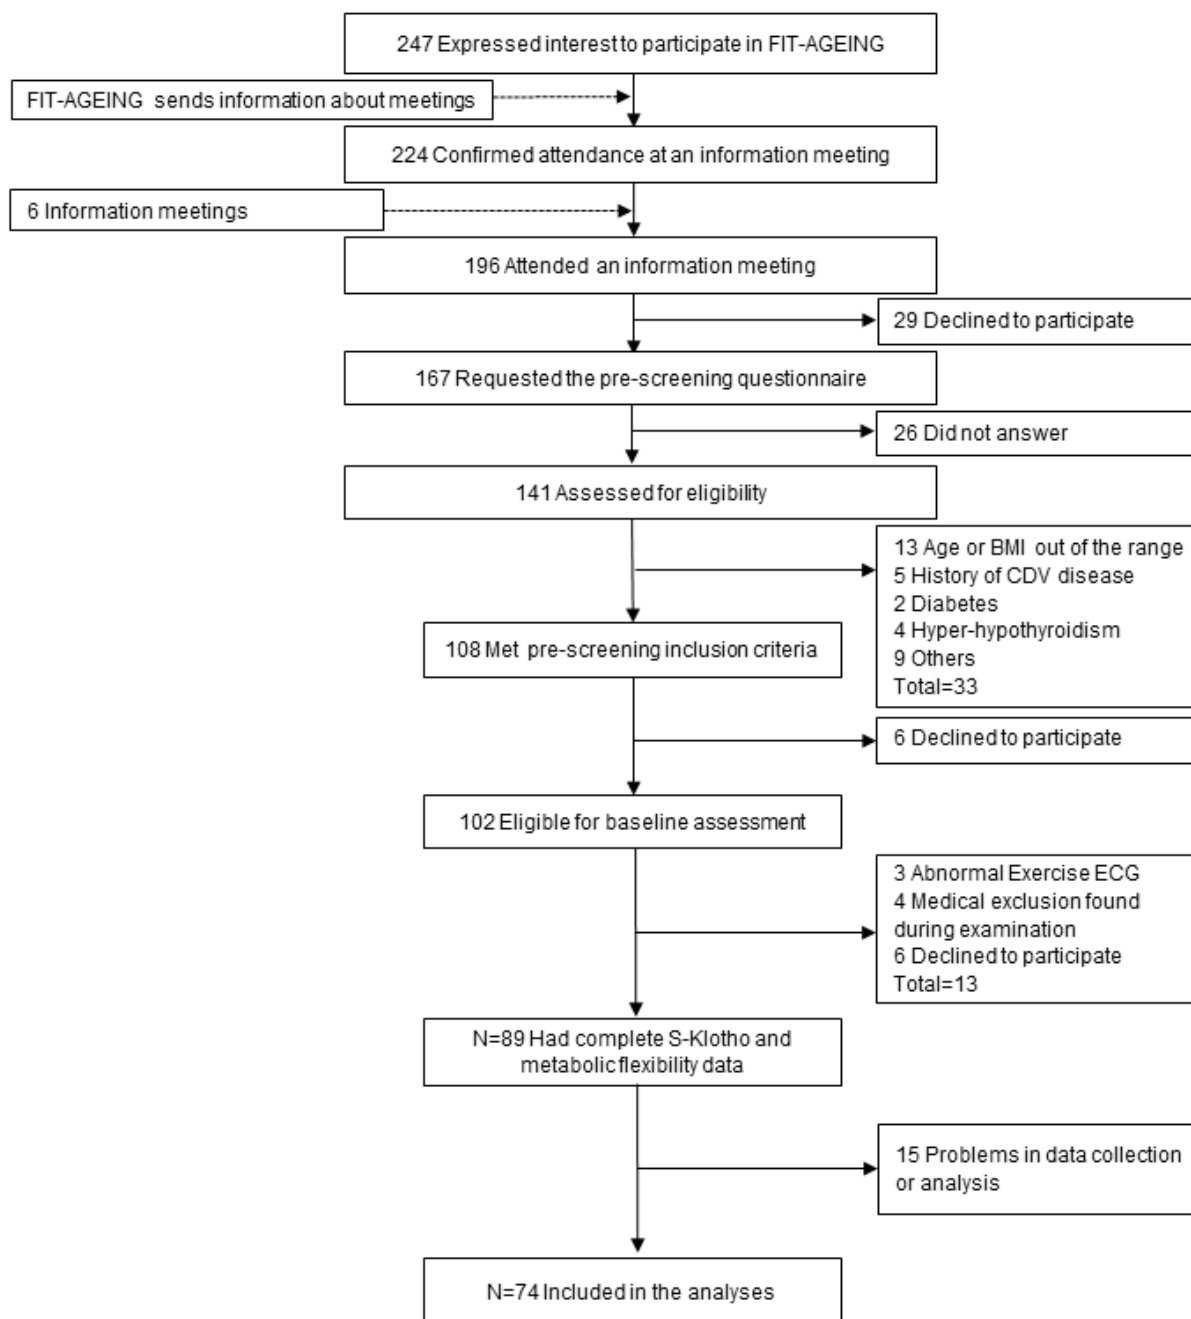

**Supplementary Figure S1. Flow-chart showing recruitment of study subjects.** BMI: body mass index, CDV: cardiovascular, ECG: electrocardiogram.
